# Supplementary material for: Superior Mechanoluminescence of ZnS:Mn/ZnO Heterostructure Array Chip Boosted by Type Ⅱ Electron Transition
Source: Research Square preprint supplement (doi:10.21203/rs.3.rs-7927301/v1), 2025-11-13
Supplement: Supplementary file 1 [file 51872058b75b63671700809d.docx]

Superior Mechanoluminescence of ZnS:Mn/ZnO Heterostructure Array Chip Boosted by Type Ⅱ Electron Transition

Jiateng Fan1,3, Yunkai Wang3, Aihua Zhong1,3*, Hang Yang2, Zhiheng Ma1,3, Shuangmei Xue1, Dengfeng Peng1,3, Longbiao Huang3, Jingting Luo1,3, Dong Tu2*, Kazuhiro Hane4

1State Key Laboratory of Radio Frequency Heterogeneous Integration, College of Physics and Optoelectronic Engineering, Shenzhen University, Shenzhen 518060, P.R. China

2Faculty of Materials Science and Chemistry, China University of Geosciences, 388 Lumo Road, Wuhan 430074, China

3Key Laboratory of Optoelectronic Devices and Systems of Ministry of Education and Guangdong Province, College of Physics and Optoelectronic Engineering, Shenzhen University, Shenzhen 518060, China

4New Industry Creation Hatchery Center, Tohoku University, Sendai, 980-8579, Japan

Corresponding authors: Aihua Zhong ([zhongah@szu.edu.cn](mailto:zhongah@szu.edu.cn)), Dong Tu ([tudong@cug.edu.cn](mailto:tudong@cug.edu.cn))


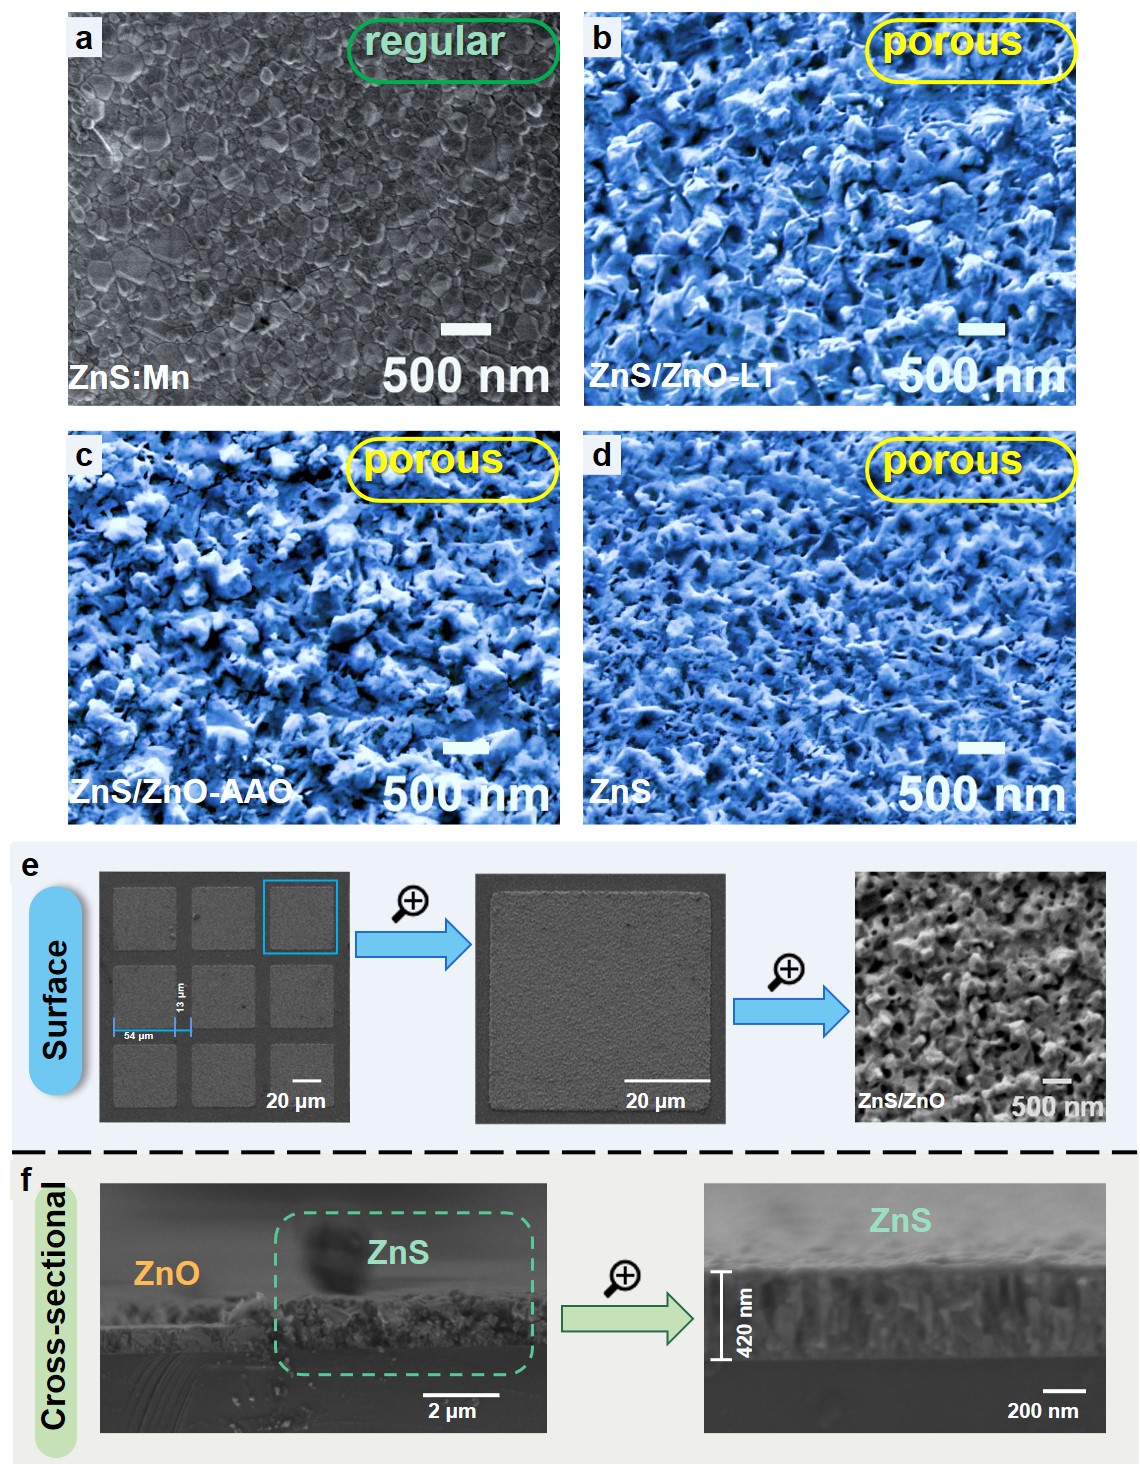


**Figure S1** SEM images of (a) the compact ZnS:Mn film directly grown by ZnS target, (b) the ZnS:Mn /ZnO-LT heterostructure, (c) the ZnS:Mn /ZnO-AAO heterostructure, and (d) the ZnS:Mn film prepared by sulfidation of ZnO:Mn. (e) SEM images of the ZnS:Mn/ZnO-LT heterostructure array. (f) Cross-sectional images of the ZnS:Mn /ZnO-LT heterostructure.


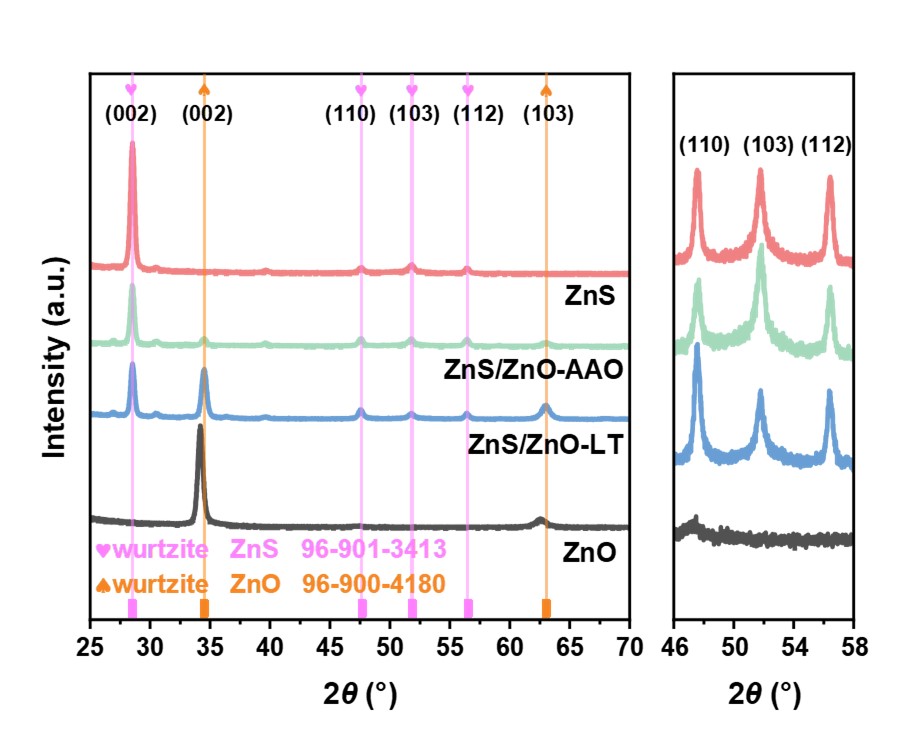


**Figure S2** XRD patterns of the ZnS:Mn, the ZnO, the ZnS:Mn/ZnO-AAO, and the ZnS:Mn/ZnO-LT heterostructure thin films. Parts of the ZnO film were successfully protected from sulfidation by AlN barrier or the AAO.


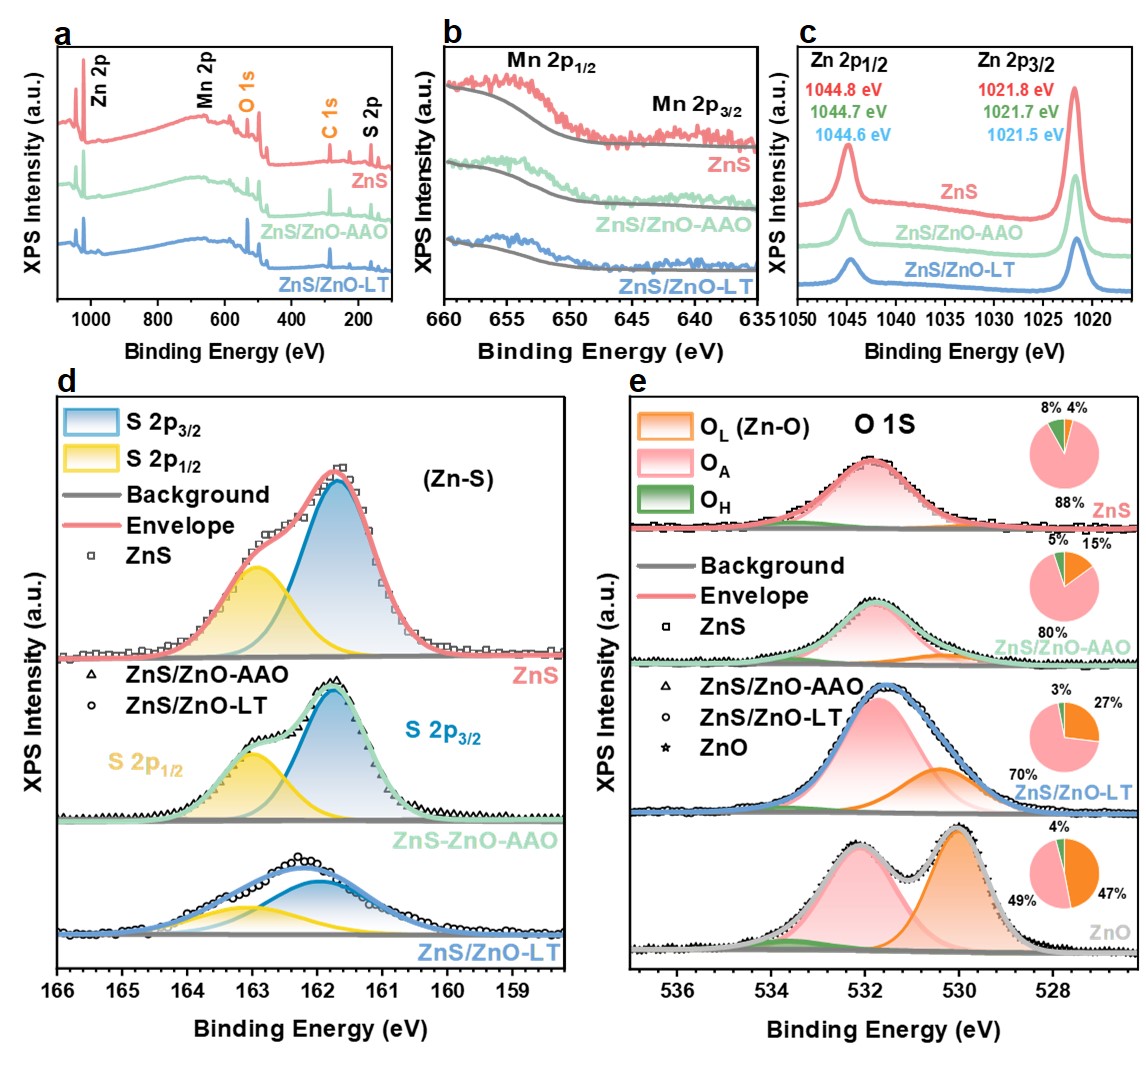


**Figure S3** a) XPS survey curve of the sulfidated ZnS:Mn, the ZnS:Mn /ZnO-AAO, and the ZnS:Mn /ZnO-LT heterostructure thin films, and the corresponding high-resolution XPS curves of b) Mn 2p, c) Zn 2p, d) S 2p and e) O 1S, respectively. Mn 2p peaks centered at 653.4 eV and 639.5 eV, corresponding to Mn 2p1/2 and Mn 2p3/2, respectively1,2. The asymmetric S 2p peak of sulfur was resolved into two subpeaks at 161.1 eV and 162.2 eV. The binding energy peak at 161.1 eV corresponds to the sulfur ion (S2-) within the ZnS structure3,4. The binding energy peak at 529.7 eV corresponding to the oxygen ions (O2-) within the lattice (OL), confirming the existence of Zn-O chemical bonds in the film5–7. For the ZnS film, no OL is observed, suggesting the completed sulfidation of the ZnO to ZnS film.


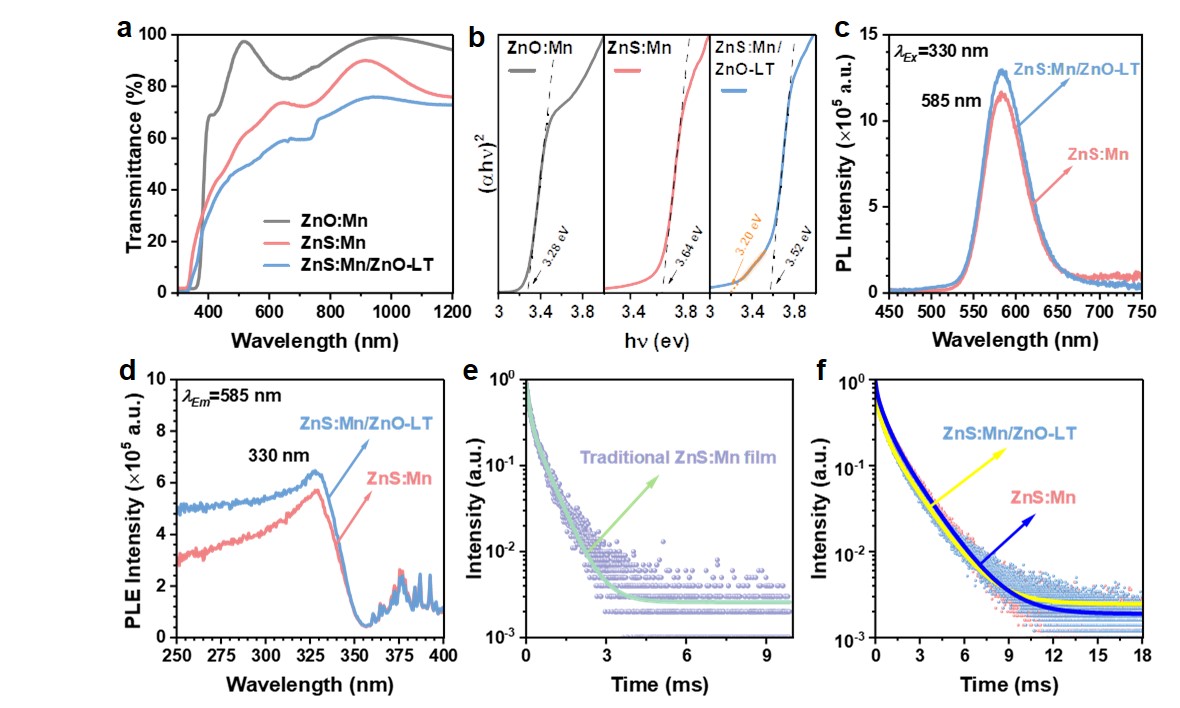


**Figure S4** a) The transmittance spectra of the ZnO, the ZnS, and the ZnS:Mn/ZnO-LT heterostructure films. b) optical band gap of three films. c) PL spectra of ZnS:Mn films and the ZnS:Mn/ZnO-LT heterostructure. d) PLE spectra of ZnS and the ZnS:Mn/ZnO-LT films. PL decay curves of e) traditional ZnS: Mn films and f) porous ZnS:Mn film and ZnS:Mn/ZnO-LT heterostructure (*λ*Em = 585 nm, *λ*Ex = 330 nm).


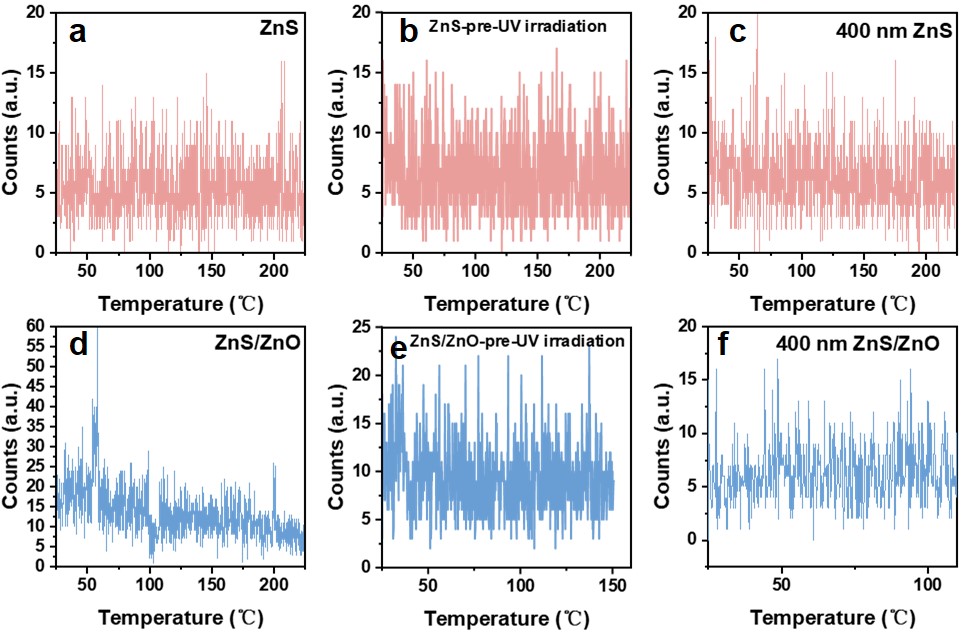


**Figure S5** Thermoluminescence spectra of ZnS and ZnS/ZnO films with different thicknesses and substrates. a) 200 nm thick ZnS films on quartz substrates. b) 200 nm thick ZnS/ZnO films on quartz substrates. c) 200 nm thick ZnS films on a Si substrate with an oxide layer. d) 200 nm thick ZnS/ZnO films on a Si substrate with an oxide layer. e) 400 nm thick ZnS films on quartz substrates. f) 400 nm thick ZnS/ZnO films on quartz substrates

**Figure S6** ML spectrum of 200 nm thick (a) ZnS:Mn, (b)ZnS:Mn/ZnO-AAO, and (c) ZnS:Mn/ZnO-LT heterostructure thin films grown on quartz glass substrates. (d) and (e) Summarized ML intensity of three films.

**Figure S7** ML spectrum of 400 nm thick (a) ZnS:Mn, (b)ZnS:Mn/ZnO-AAO, and (c) ZnS:Mn/ZnO-LT heterostructure thin films grown on sapphire substrates. (d) and (e) Summarized ML intensity of three films.


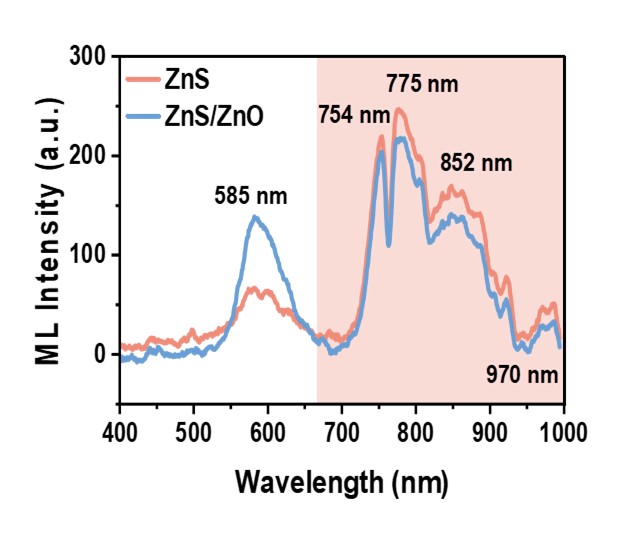


**Figure S8** ML performances of the sulfidated ZnS:Mn, and the ZnS:Mn /ZnO-LT heterostructure thin films upon mechanical stimulus with frequency of 500 Hz.


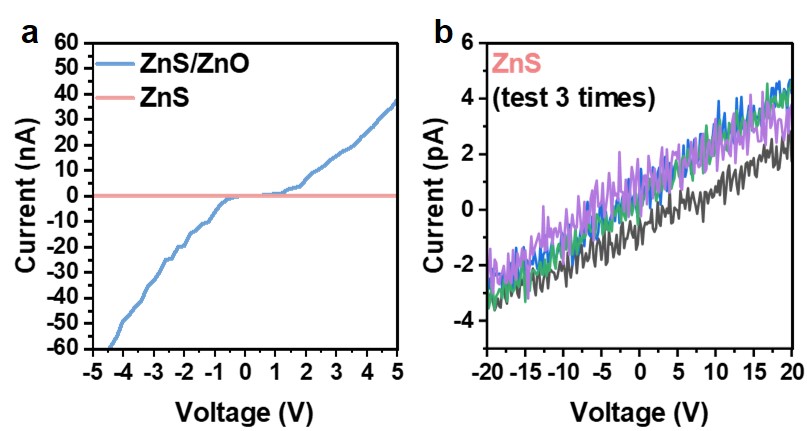


**Figure S9** (a) Current-voltage curve of the sulfidated ZnS:Mn, and the ZnS:Mn /ZnO-LT heterostructure thin films; (b) Represented current-voltage curve of the sulfidated ZnS:Mn.


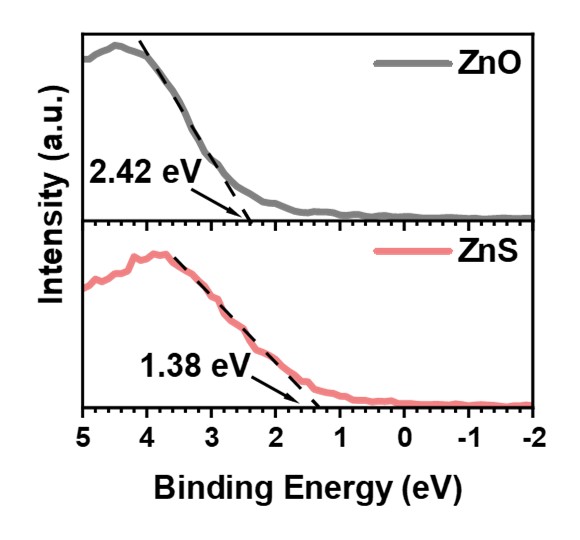


**Figure S10** Valence-band edge (VBE) spectra of the ZnO and ZnS films.


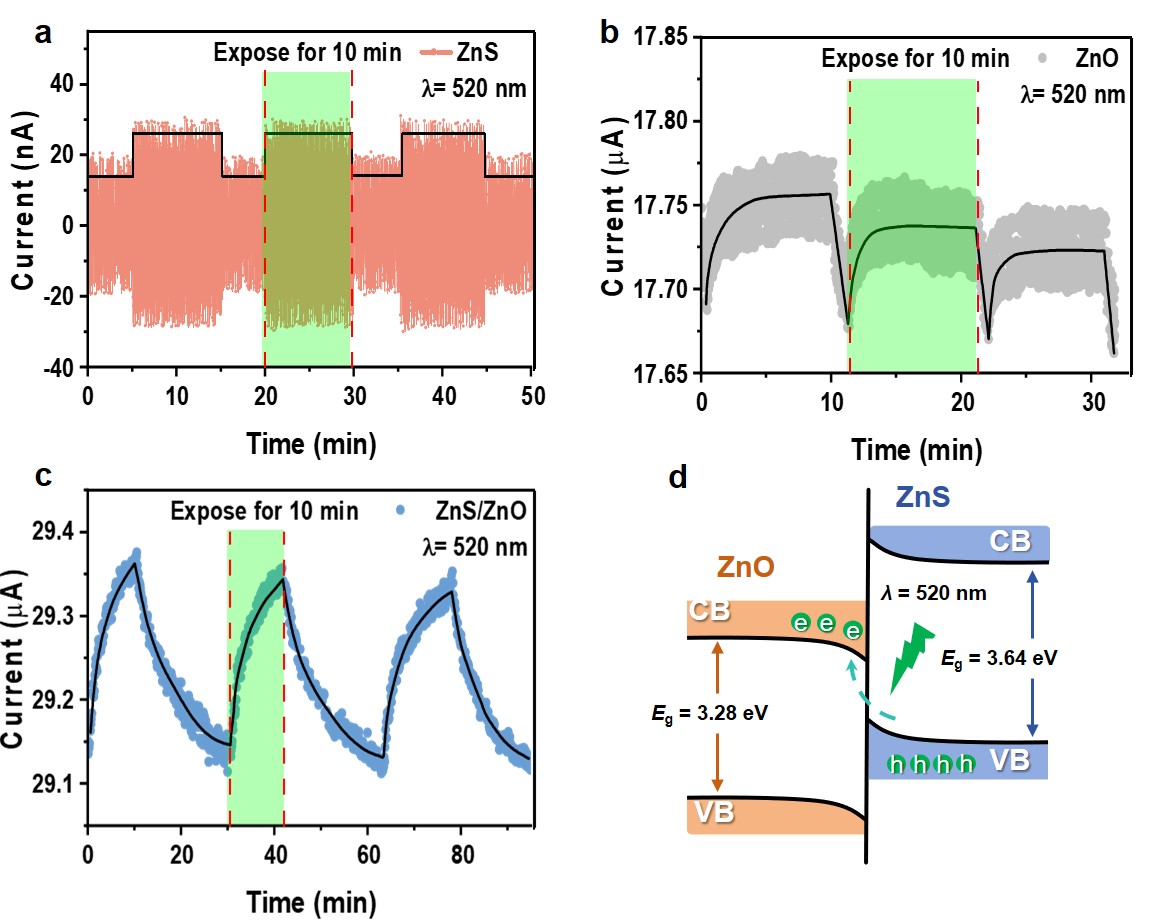


**Figure S11** Current response of (a) the sulfidated ZnS:Mn film, (b) the ZnO film, and (c) the ZnS:Mn/ZnO-LT heterostructure under a 520 nm light illumination. The photon response in (a) and (b) are negligible since the bandgaps of the ZnS and the ZnO are 3.64 and 3.28 eV, respectively, larger than the energy of 520 nm (2.39 eV). Thus the electrons in the valence band of these two materials could not be directly activated to their conduction band. Interestingly, the photon response of the ZnS:Mn/ZnO-LT heterostructure in (c)is significant, suggesting the type Ⅱ electron transition. (d) Illustration of the type Ⅱ electron transition, where the electrons in the valence band of ZnS are activated to the conduction band of the ZnO by the 2.39 eV photons.

**Figure S12** Photoluminescence spectra of the films deposited with various powers of the Mn targets while the power of ZnO target was kept at a constant of 100 W.

**Figure S13** Temperature process during annealing and sulfur powder heating process.


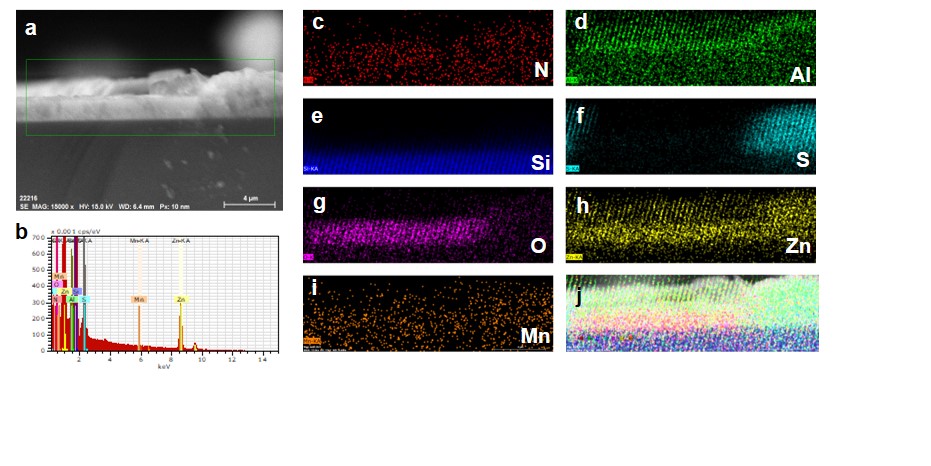


**Figure S14** (a）Cross-sectional image of the ZnS:Mn/ZnO-LT film. (b) EDS measurement. (c)-(j) EDS mappings of elements.

**Table S1.**

Lifetime of the traditional ZnS:Mn, ZnS:Mn, ZnS:Mn/ZnO-LT films.

| Sample | A1 | 𝜏1(ms) | A2 | 𝜏2(ms) | A3 | 𝜏3(ms) | 𝜏ave(ms) |
| --- | --- | --- | --- | --- | --- | --- | --- |
| Traditional ZnS:Mn | 541 | 0.111 | 364 | 0.571 | null | null | 0.468 |
| ZnS:Mn | 236 | 0.098 | 39 | 0.546 | 342 | 1.679 | 1.32 |
| ZnS:Mn/ZnO-LT | 335 | 0.041 | 218 | 0.405 | 281 | 1.631 | 1.33 |

**Table S2.**

Peak positions of core level and VBM positions used to calculate the VBO and CBO.

| Sample | Region | Binding Energy (eV) |
| --- | --- | --- |
| ZnS | S 2P | 161.68 |
|  | VBM | 1.38 |
| ZnO | O 1S | 530.01 |
|  | VBM | 2.42 |
| ZnS/ZnO | S 2P | 161.95 |
|  | O 1S | 530.4 |

**Determination of the energy band alignment of the ZnS:Mn/ZnO heterostructure:**

Utilizing XPS core-level spectra results in **Figure S10** and **Table S2**, the energy band diagram of the ZnS:Mn/ZnO heterostructure could be precisely determined. The position of the valence band maximum (VBM) can be determined through a linear extrapolation of the leading edges of the valence band spectra, as shown in **Figure** S9, which were recorded on ZnO and ZnS films. The VBM values of ZnO and ZnS are 2.42 eV and 1.38 eV, respectively, relative to Fermi energy level. The valence band offset (VBO, ∆) and conduction band offset (CBO, ∆) are described by the formula8,9:

∆=(-)interface-(-)+(-) (1)

∆=--∆ (2)

Where and is meaured by Tauc plot and depicted in **Figure** 6b. (-)interface is the energy difference between O 1s and S 2p core levels, which is measured from the ZnS/ZnO films, (-) is the energy difference between O 1s and VBM in the ZnO films, (-) is the energy difference between S 2p and VBM in the ZnS films. The above values in detail are summarized in **Table S2**.

Based on the data in **Table S2**, the energy band diagrams of isolated ZnS and ZnO before forming the ZnO/ZnS heterostructure could be precisely determined. The valence band offset ∆and the conduction band offset ∆between the ZnO and ZnS were calculated according to eq (1) and (2), 1.16 and 1.52 eV, respectively. The difference between the conduction band (CB) of the ZnO and the valence band (VB) of the ZnS is 2.12 eV. After contacting, some electrons in the ZnS flow into the ZnO to achieve thermal equilibrium, leading to a band-bending in the ZnS/ZnO interface. Herein, the difference between the CBZnO and the VBZnS is smaller than the energy gap of the ZnS. This kind of energy band is called as type Ⅱ energy band.

**References:**

1 Zhou T, Chen H, Guo J, Zhao Y, Du X, Zhang Q *et al.* Unrevealing Temporal Mechanoluminescence Behaviors at High Frequency via Piezoelectric Actuation. *Small* 2023; **19**: 2207089.

2 Wang Y, Fan J, Su H, Wu Y, Tu D, Peng D *et al.* The Determining Role of Stacking Fault in The Mechanoluminescence Properties of ZnS: Mn Thin Films. *Applied Surface Science* 2024; **656**: 159583.

3 Kim S, Yang F, Jung HS, Hong G, Hahn SK. Mechanoluminescence and Mechanical Quenching of Afterglow Luminescent Particles for Wearable Photonic Display. *Adv Funct Materials* 2024; **34**: 2314861.

4 Liang Y-C, Wang C-C. Surface Crystal Feature-dependent Photoactivity of ZnO–ZnS Composite Rods *via* Hydrothermal Sulfidation. *RSC Adv* 2018; **8**: 5063–5070.

5 Bera S, Khan H, Biswas I, Jana S. Polyaniline Hybridized Surface Defective ZnO Nanorods with Long-term Stable Photoelectrochemical Activity. *Applied Surface Science* 2016; **383**: 165–176.

6 Han J, Liu W, Zhang T, Xue K, Li W, Jiao F *et al.* Mechanism Study on The Sulfidation of ZnO with Sulfur and Iron Oxide at High Temperature. *Sci Rep* 2017; **7**: 42536.

7 Liu W, Zhu L, Han J, Jiao F, Qin W. Sulfidation Mechanism of ZnO Roasted with Pyrite. *Sci Rep* 2018; **8**: 9516.

8 Guo P, Jiang J, Shen S, Guo L. ZnS/ZnO Heterojunction as Photoelectrode: Type II Band Alignment Towards Enhanced Photoelectrochemical Performance. *International Journal of Hydrogen Energy* 2013; **38**: 13097–13103.

9 Gu X, Zhang S, Zhao Y, Qiang Y. Band Alignment of ZnO/ZnS Heterojunction Prepared through Magnetron Sputtering and Measured by X-ray Photoelectron Spectroscopy. *Vacuum* 2015; **122**: 6–11.
